# Supplementary material for: Global Transcriptome Analysis of Aedes aegypti Mosquitoes in Response to Zika Virus Infection
Source: PubMed Central journal article supplement (PMC5700376; doi:10.1128/msphere.00456-17), 2017-11-22

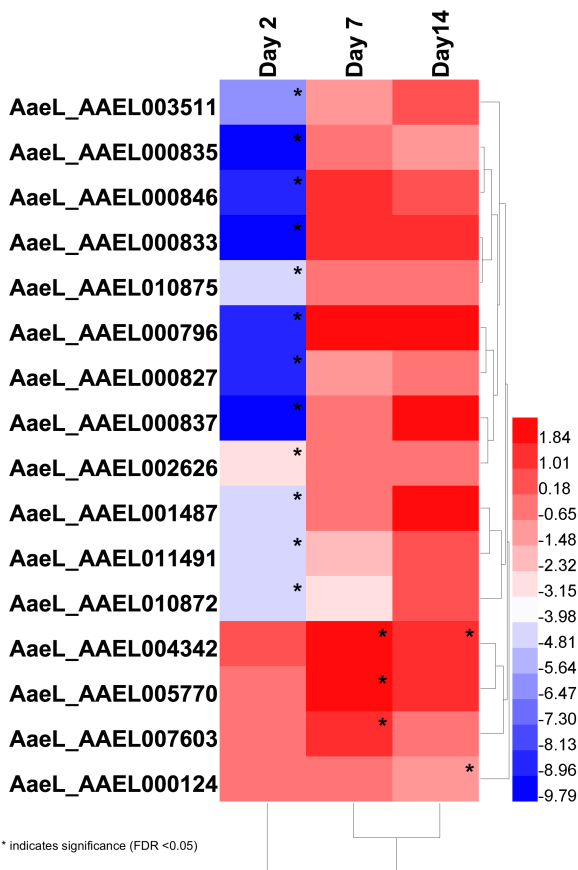

Supplement: sph006172406sf1.pdf [file sph006172406sf1.pdf]
